# Supplementary material for: The Leg Fat to Total Fat Ratio Is Associated with Lower Risks of Non-Alcoholic Fatty Liver Disease and Less Severe Hepatic Fibrosis: Results from Nationwide Surveys (KNHANES 2008–2011)
Source: PubMed Central journal article supplement — Endocrinol Metab (Seoul). 2021 Nov 23;36(6):1232–42. doi: 10.3803/EnM.2021.1087 (PMC8743580; doi:10.3803/enm.2021.1087), 2021-11-23
Supplement: enm-2021-1087-suppl2.pdf [file enm-2021-1087-suppl2.pdf]

**Supplemental Table S2.** Metabolic Parameters That Correlated with Leg Fat to Total Fat Ratio Based on Simple Regression Analysis

| Variable                        | Simple regression analysis |                |
|---------------------------------|----------------------------|----------------|
|                                 | <i>r</i>                   | <i>P</i> value |
| Age, yr                         | -0.465                     | <0.001         |
| BMI, kg/m <sup>2</sup>          | -0.495                     | <0.001         |
| Waist circumference, cm         | -0.622                     | <0.001         |
| Systolic blood pressure, mm Hg  | -0.397                     | <0.001         |
| Diastolic blood pressure, mm Hg | -0.315                     | <0.001         |
| Fasting glucose, mg/dL          | -0.324                     | <0.001         |
| Fasting insulin, $\mu$ IU/mL    | -0.394                     | <0.001         |
| HOMA-IR                         | -0.246                     | <0.001         |
| Total cholesterol, mg/dL        | -0.248                     | <0.001         |
| HDL-C, mg/dL                    | 0.356                      | <0.001         |
| LDL-C, mg/dL                    | -0.251                     | <0.001         |
| Triglycerides, mg/dL            | -0.396                     | <0.001         |
| AST, IU/L                       | -0.257                     | <0.001         |
| ALT, IU/L                       | -0.307                     | <0.001         |

BMI, body mass index; HOMA-IR, homeostasis model assessment of insulin resistance; HDL-C, high-density lipoprotein cholesterol; LDL-C, low-density lipoprotein cholesterol; AST, aspartate aminotransferase; ALT, alanine transaminase.
