# Supplementary material for: The Leg Fat to Total Fat Ratio Is Associated with Lower Risks of Non-Alcoholic Fatty Liver Disease and Less Severe Hepatic Fibrosis: Results from Nationwide Surveys (KNHANES 2008–2011)
Source: PubMed Central journal article supplement — Endocrinol Metab (Seoul). 2021 Nov 23;36(6):1232–42. doi: 10.3803/EnM.2021.1087 (PMC8743580; doi:10.3803/enm.2021.1087), 2021-11-23
Supplement: enm-2021-1087-suppl4.pdf [file enm-2021-1087-suppl4.pdf]

**Supplemental Table S4.** AORs with 95% CIs of NAFLD Assessed by Different Predictive Models in Women

| Variable                      | NAFLD assessed by CNS<br>(n=2,174, 26.7%) |            |         | NAFLD assessed by NLFS<br>(n=2,371, 26.1%) |             |         | NAFLD assessed by HSI<br>(n=1,825, 20.1%) |           |         |
|-------------------------------|-------------------------------------------|------------|---------|--------------------------------------------|-------------|---------|-------------------------------------------|-----------|---------|
|                               | AOR                                       | 95% CI     | P value | AOR                                        | 95% CI      | P value | AOR                                       | 95% CI    | P value |
| Adjusted model 1 <sup>a</sup> |                                           |            |         |                                            |             |         |                                           |           |         |
| LF/TF ratio Q1                | 8.89                                      | 5.35–14.78 | <0.001  | 8.78                                       | 6.33–12.17  | <0.001  | 4.12                                      | 2.57–6.59 | <0.001  |
| LF/TF ratio Q2                | 4.10                                      | 2.47–6.78  | <0.001  | 4.38                                       | 3.17–6.05   | <0.001  | 2.93                                      | 1.85–4.66 | <0.001  |
| LF/TF ratio Q3                | 2.20                                      | 1.31–3.69  | 0.003   | 2.26                                       | 1.62–1.01   | <0.001  | 2.01                                      | 1.26–3.23 | 0.004   |
| LF/TF ratio Q4                | 1.00                                      | Reference  |         | 1.00                                       | Reference   |         | 1.00                                      | Reference |         |
| Adjusted model 2 <sup>b</sup> |                                           |            |         |                                            |             |         |                                           |           |         |
| LF/TF ratio Q1                | 9.86                                      | 5.50–17.74 | <0.001  | 9.68                                       | 6.65–14.08  | <0.001  | 3.41                                      | 2.07–5.61 | <0.001  |
| LF/TF ratio Q2                | 4.16                                      | 2.34–7.43  | <0.001  | 4.33                                       | 3.06–6.41   | <0.001  | 2.41                                      | 1.48–3.93 | <0.001  |
| LF/TF ratio Q3                | 2.23                                      | 1.23–4.01  | 0.006   | 2.22                                       | 1.52–3.23   | 0.001   | 1.80                                      | 1.09–2.94 | 0.021   |
| LF/TF ratio Q4                | 1.00                                      | Reference  |         | 1.00                                       | Reference   |         | 1.00                                      | Reference |         |
| Adjusted model 3 <sup>c</sup> |                                           |            |         |                                            |             |         |                                           |           |         |
| LF/TF ratio Q1                | 3.15                                      | 1.41–7.03  | 0.005   | 2.93                                       | 1.765–4.865 | <0.001  | 2.34                                      | 1.36–4.03 | 0.002   |
| LF/TF ratio Q2                | 1.73                                      | 0.78–3.81  | 0.176   | 1.65                                       | 1.003–2.699 | 0.049   | 2.03                                      | 1.20–3.43 | 0.008   |
| LF/TF ratio Q3                | 1.16                                      | 0.52–2.62  | 0.713   | 1.20                                       | 0.727–1.971 | 0.480   | 1.52                                      | 0.89–2.59 | 0.122   |
| LF/TF ratio Q4                | 1.00                                      | Reference  |         | 1.00                                       | Reference   |         | 1.00                                      | Reference |         |

AOR, adjusted odds ratio; CI, confidence interval; NAFLD, non-alcoholic fatty liver disease; CNS, comprehensive NAFLD score; NLFS, NAFLD liver fat score; HSI, hepatic steatosis index; LF/TF, leg fat to total fat.

<sup>a</sup>Logistic models are adjusted for age and body mass index (BMI); <sup>b</sup>Logistic models are adjusted for age, BMI, sarcopenia index, hypertension status, diabetes mellitus status, regular exercise, smoking, and drinking status; <sup>c</sup>Logistic models are adjusted for age, BMI, sarcopenia index, hypertension status, diabetes mellitus status, regular exercise, smoking, drinking status, homeostasis model assessment of insulin resistance, high-density lipoprotein cholesterol, and triglyceride.
